# Supplementary material
Source: PubMed Central journal article supplement (PMC2384233)
Supplement: NIHMS47815-supplement-Supp_Figure_2.pdf [file NIHMS47815-supplement-Supp_Figure_2.pdf]

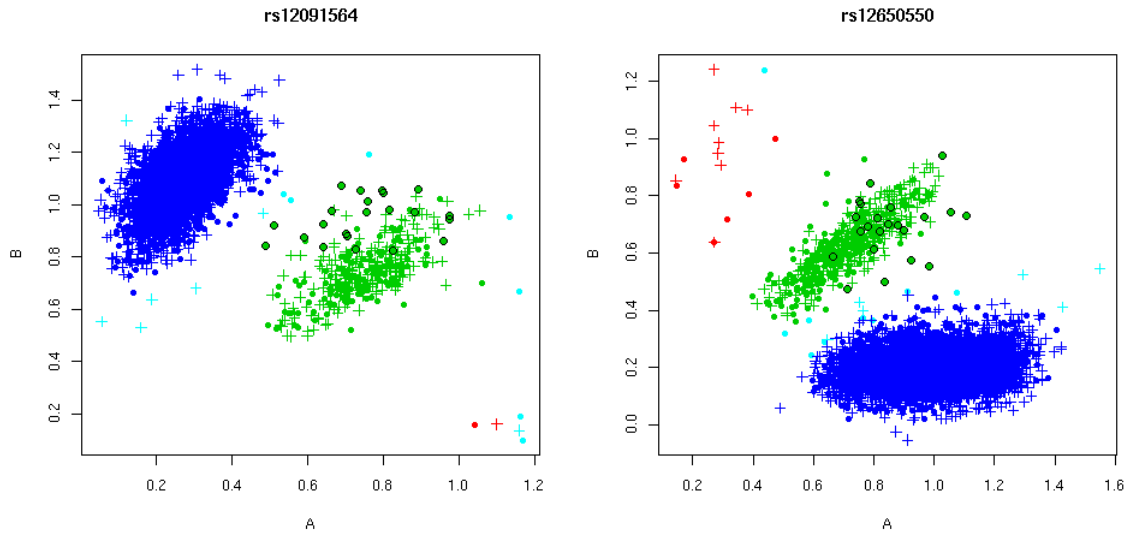

**Supplementary Figure 2.** Signal intensity cluster plots for one marker from each of two regions with highly significant localized haplotype cluster association tests for CAD versus controls. Cases are filled circles while controls are crosses. Red represents CC genotypes, green CT, dark blue TT, and turquoise null (CHIAMO score <.99). Genotypes of individuals from the significant haplotype cluster in each region are circled in black. Note that the genotypes from individuals within the significant haplotype cluster are over-represented in the ambiguous region between the CT and TT genotype clusters.
