# Supplementary material
Source: PubMed Central journal article supplement (PMC2384233)
Supplement: NIHMS47815-supplement-Suppl_Figure_1.pdf [file NIHMS47815-supplement-Suppl_Figure_1.pdf]

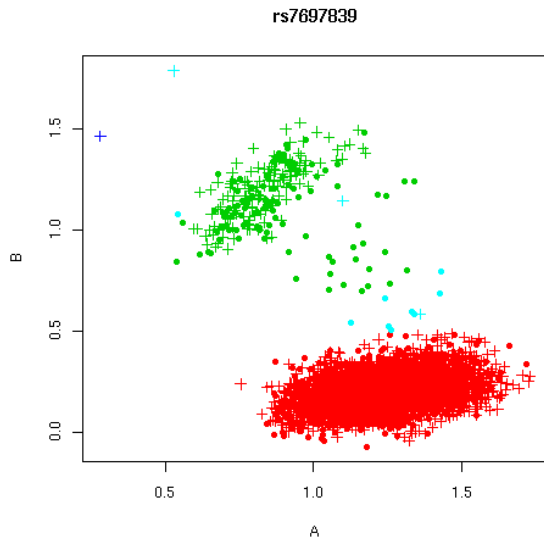

**Supplementary Figure 1.** Signal intensity cluster plots for a marker from a region with highly significant localized haplotype cluster association tests for CAD versus controls. Cases are filled circles while controls are crosses. Red represents AA genotypes, green AG, dark blue GG, and turquoise null (CHIAMO score  $<.99$ ). Note a fourth cluster of primarily case genotypes located between the main body of the AG and AA genotype clusters.
